# Supplementary material for: Radiation mitigating properties of the lignan component in flaxseed
Source: Springer Nature journal article supplement (doi:10.1186/1471-2407-13-179), 2013-04-04

**A**

## Kaplan-Meier Survival Estimates

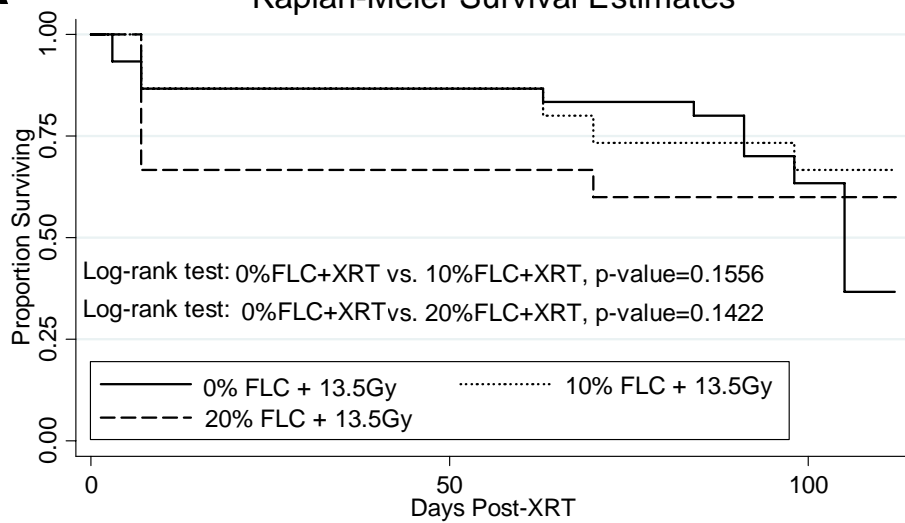**+24 Hours**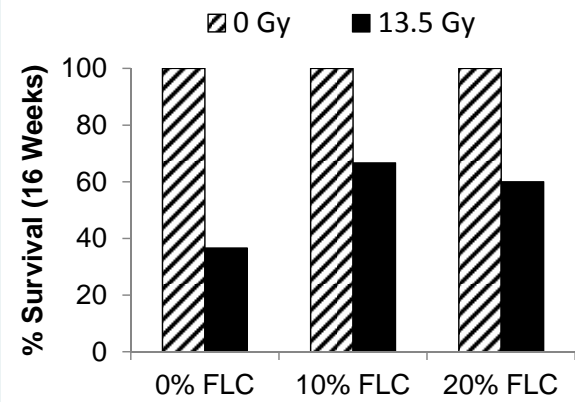**B**

## Kaplan-Meier Survival Estimates

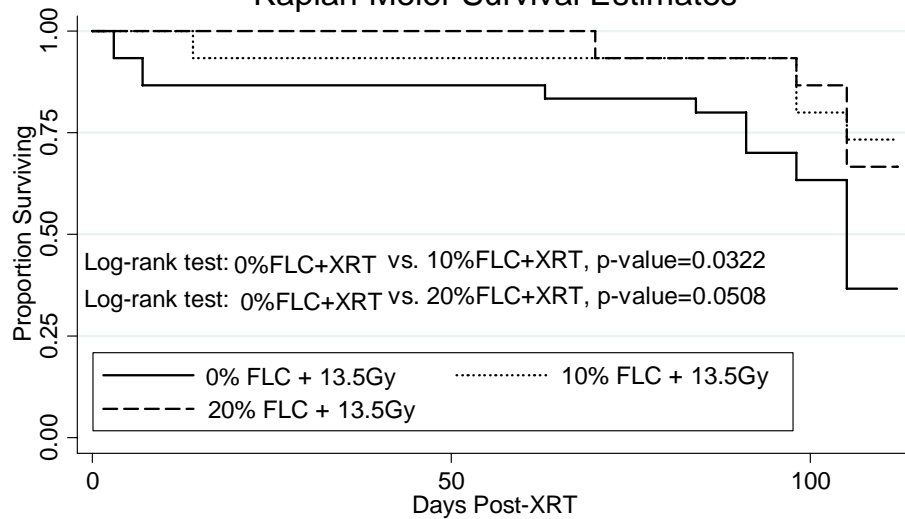**+48 Hours**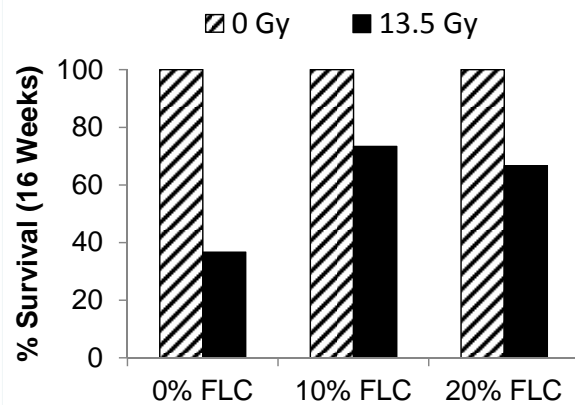**C**

## Kaplan-Meier Survival Estimates

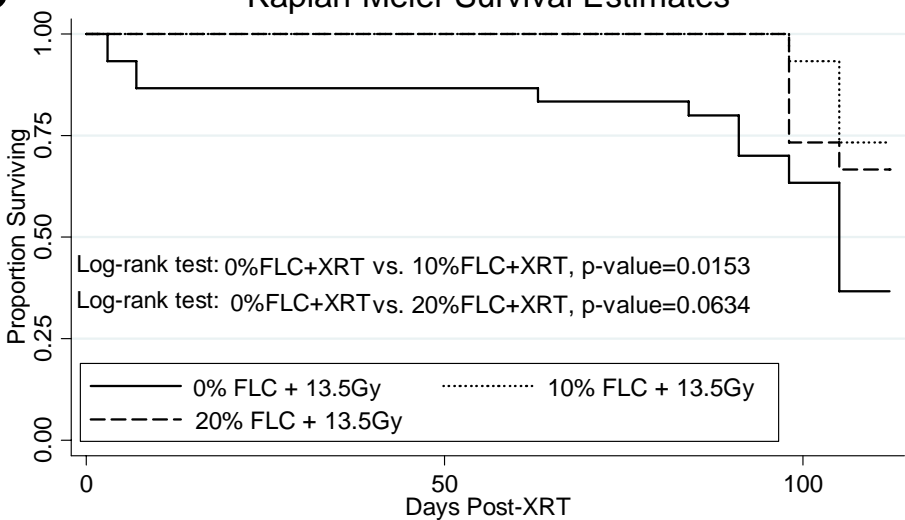**+72 Hours**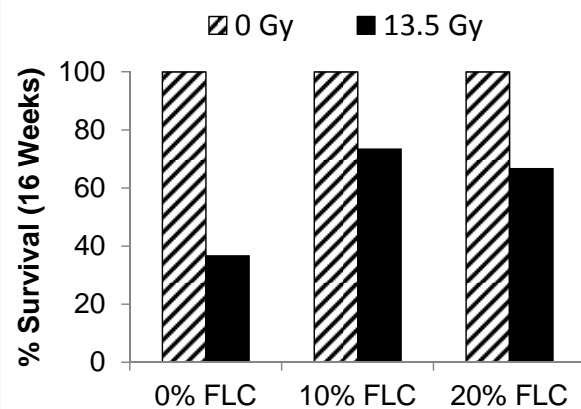

Supplement: 12885_2012_3812_MOESM4_ESM.pdf [file 12885_2012_3812_MOESM4_ESM.pdf]
