# Supplementary figures and images for: Radiation mitigating properties of the lignan component in flaxseed
Source: Springer Nature journal article supplement (doi:10.1186/1471-2407-13-179), 2013-04-04

**A**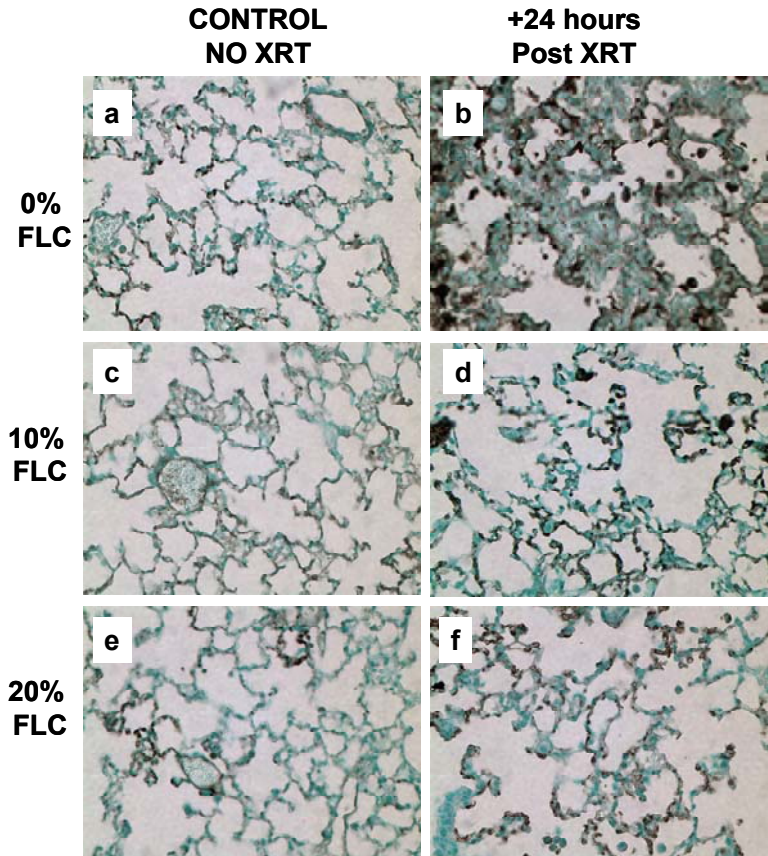**B**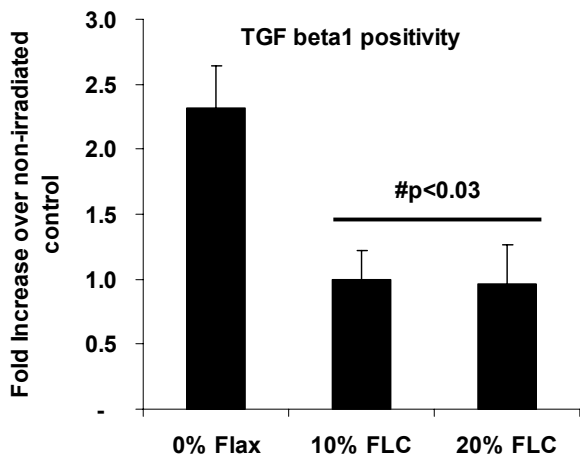

Supplement: 12885_2012_3812_MOESM10_ESM.pdf [file 12885_2012_3812_MOESM10_ESM.pdf]

XRT  
(13.5 Gy)

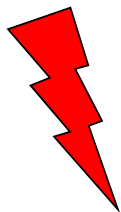

Mice on 0%, 10%, or 20% FLC

T = -72  
Hours

T = 0

+24  
Hours

+48  
Hours

+72  
Hours

T = 16 Weeks  
(sacrifice)

Start 0% FLC

Start 10% FLC or 20% FLC

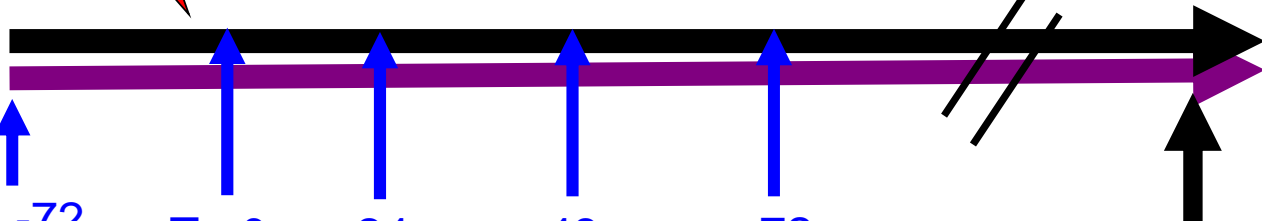

Supplement: 12885_2012_3812_MOESM1_ESM.pdf [file 12885_2012_3812_MOESM1_ESM.pdf]

**A**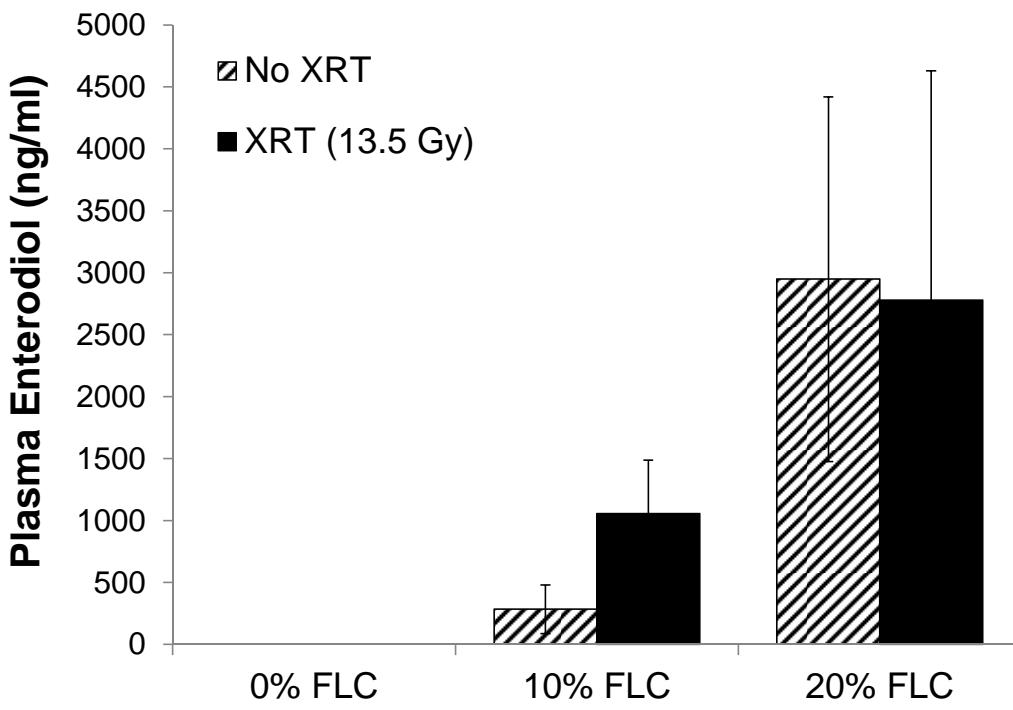**B**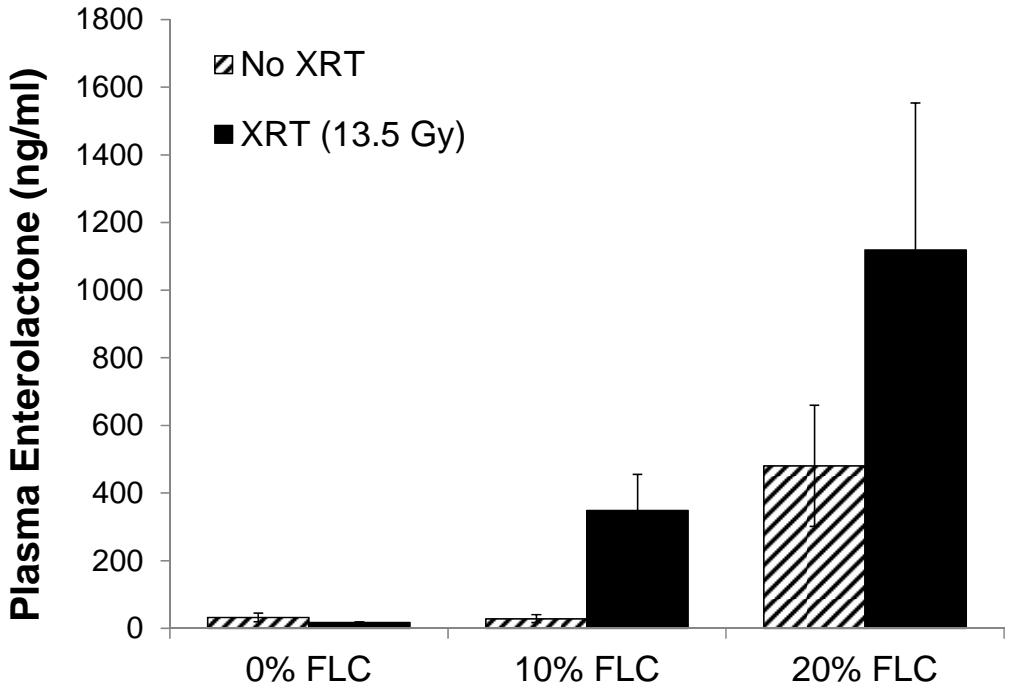

Supplement: 12885_2012_3812_MOESM2_ESM.pdf [file 12885_2012_3812_MOESM2_ESM.pdf]

**A**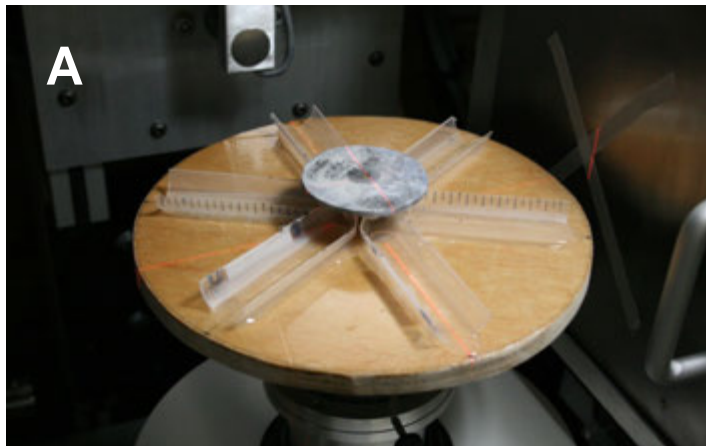**B**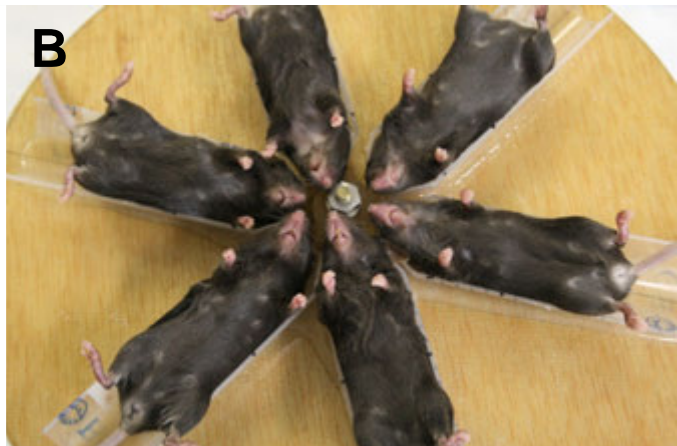**C**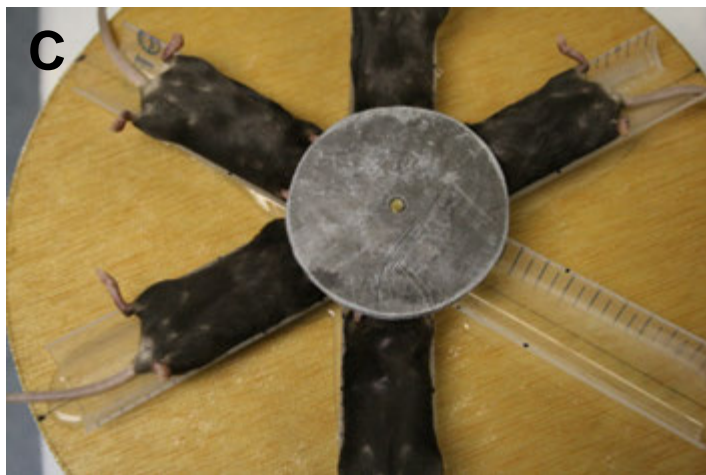**D**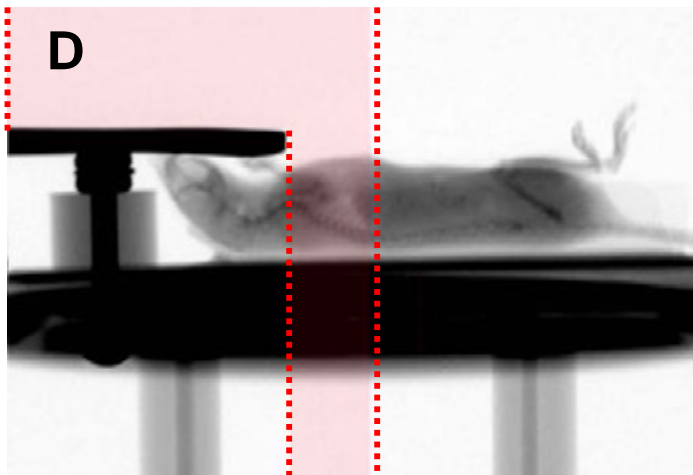

Supplement: 12885_2012_3812_MOESM3_ESM.pdf [file 12885_2012_3812_MOESM3_ESM.pdf]

**A**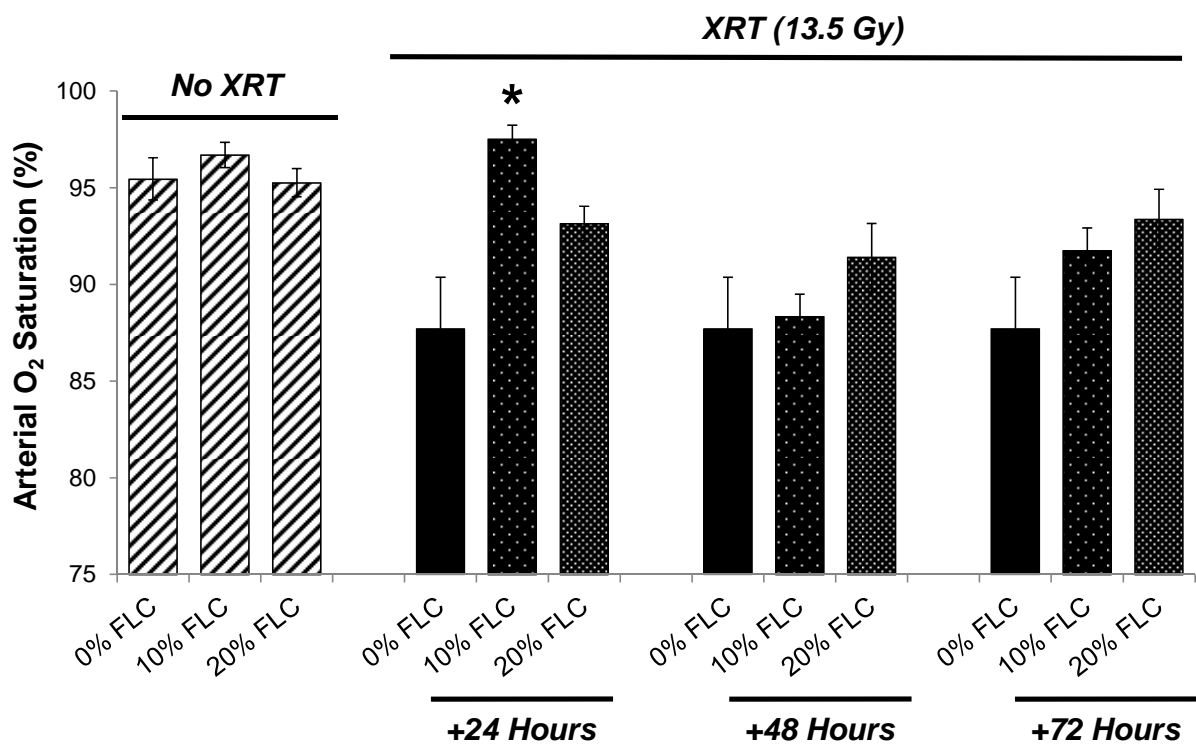**B**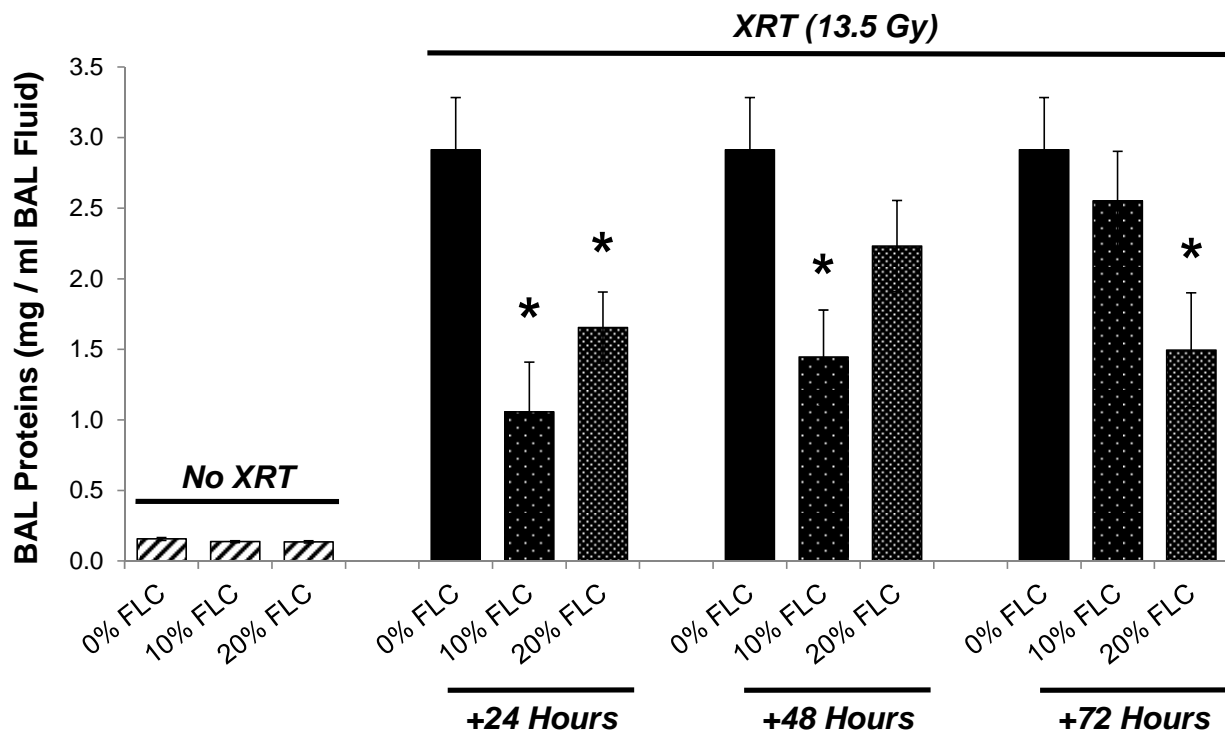

Supplement: 12885_2012_3812_MOESM5_ESM.pdf [file 12885_2012_3812_MOESM5_ESM.pdf]

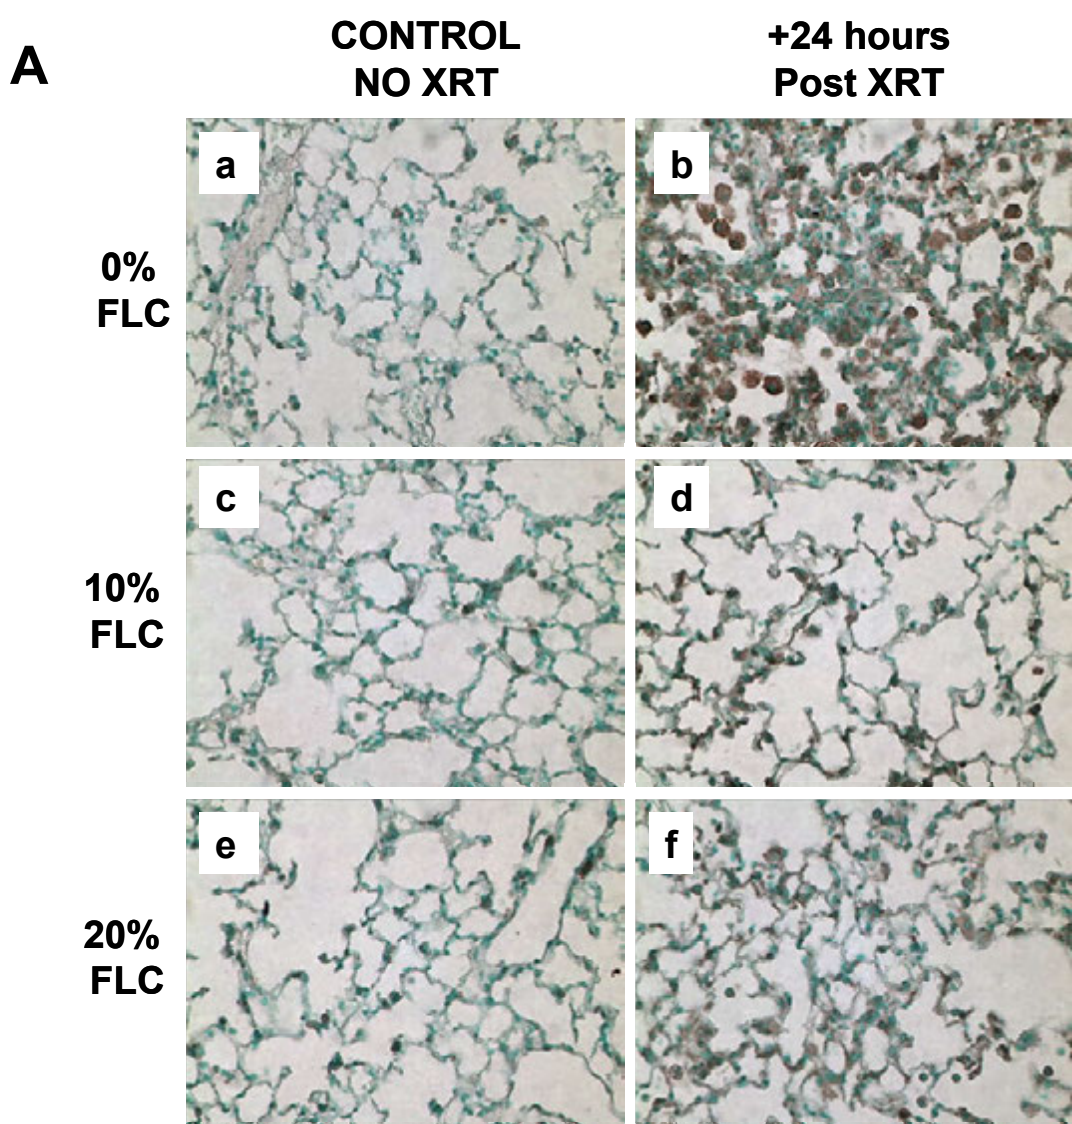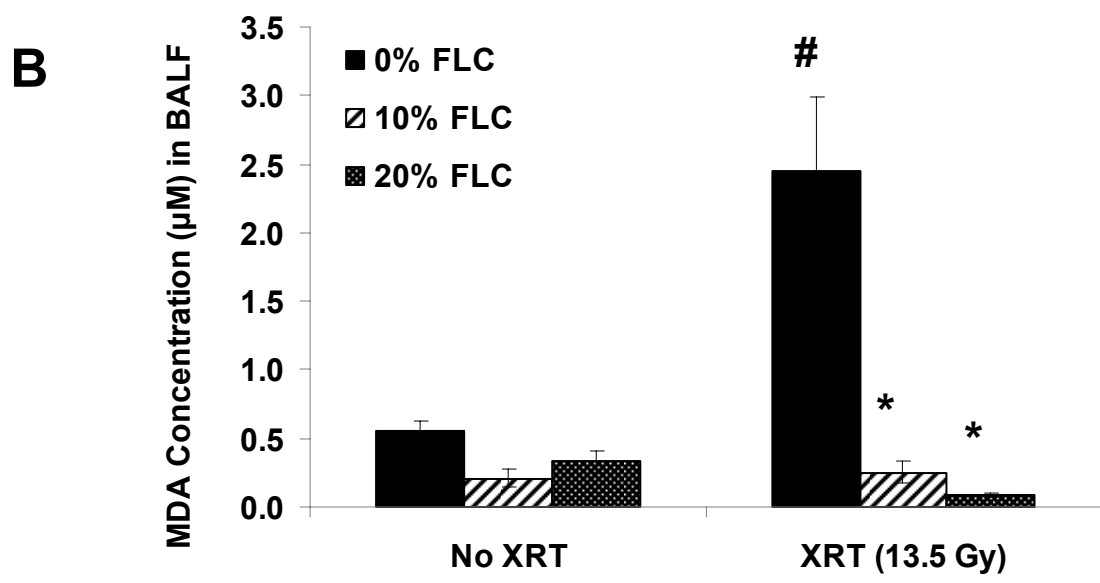

Supplement: 12885_2012_3812_MOESM6_ESM.pdf [file 12885_2012_3812_MOESM6_ESM.pdf]

**A**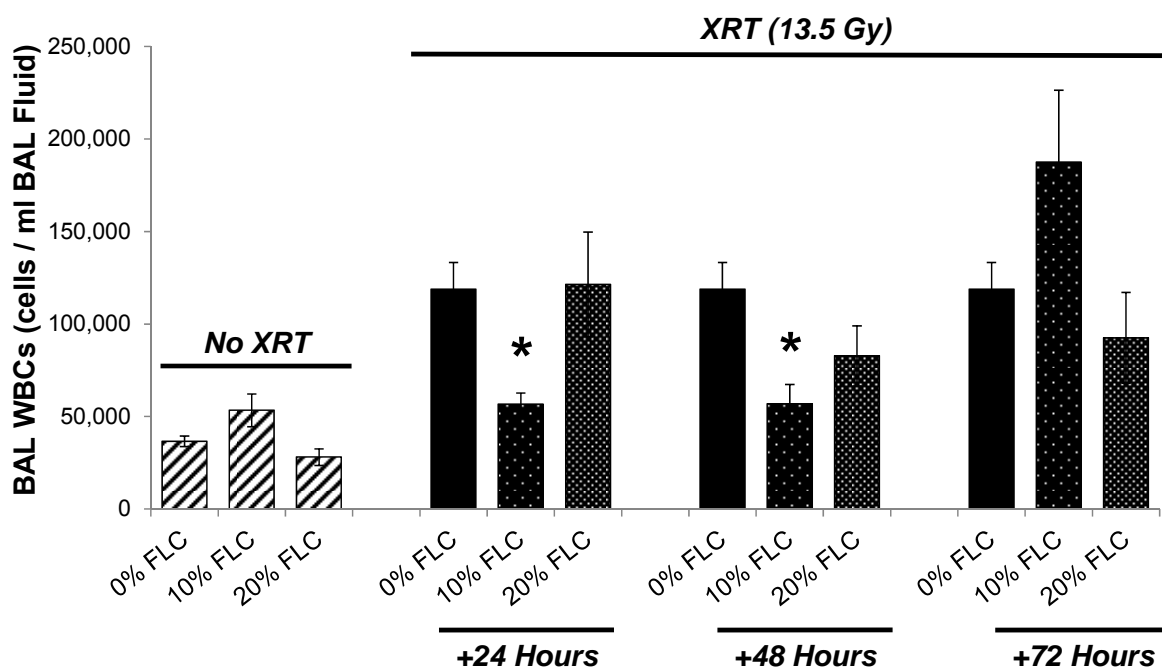**B**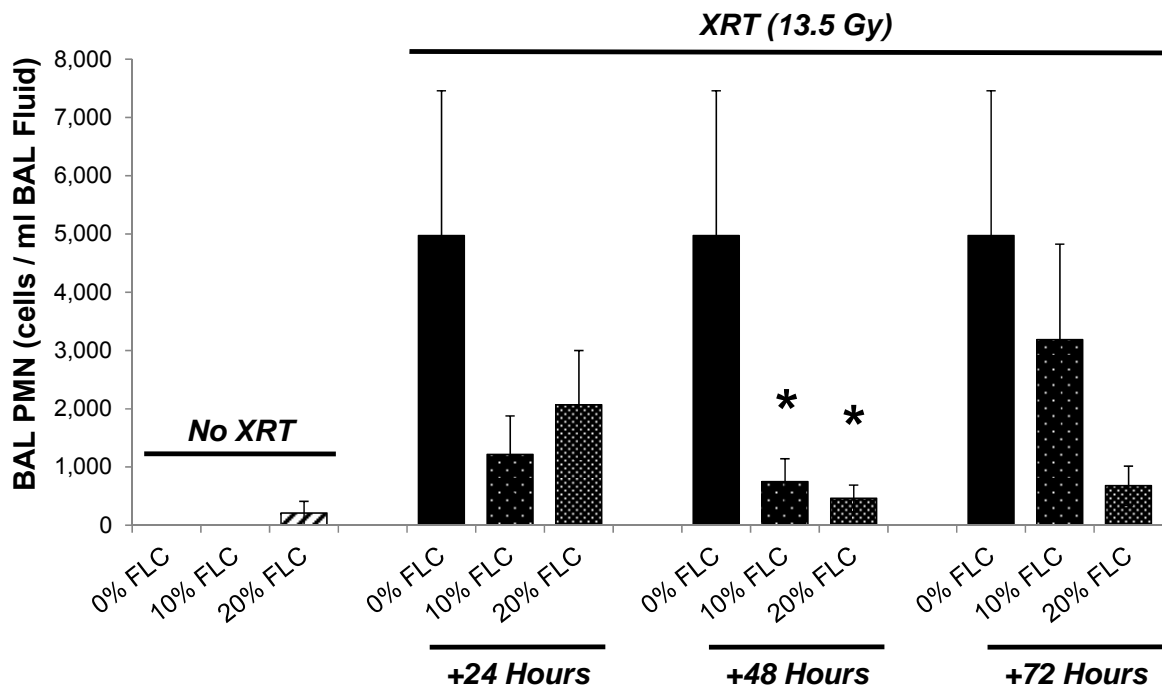

Supplement: 12885_2012_3812_MOESM7_ESM.pdf [file 12885_2012_3812_MOESM7_ESM.pdf]

**+24 hours**

**+48 hours**

**+72 hours**

**0%  
FLC**

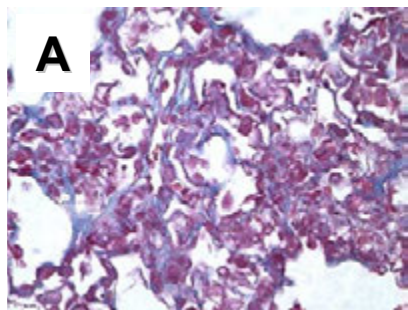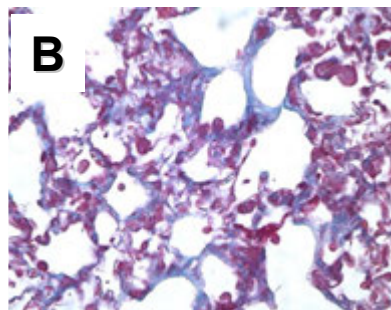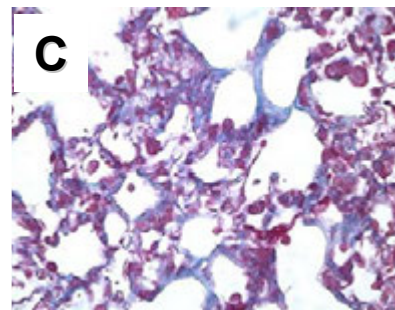

**10%  
FLC**

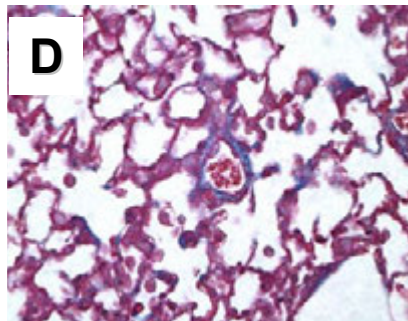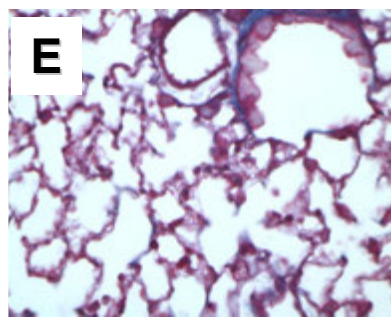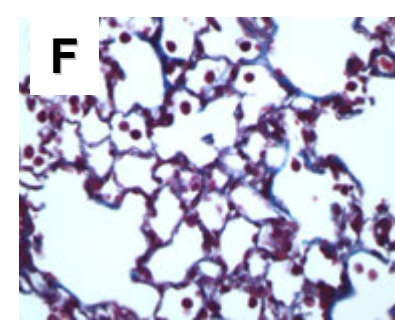

**20%  
FLC**

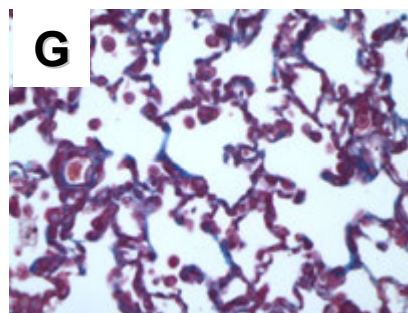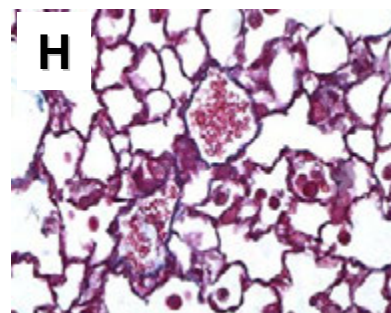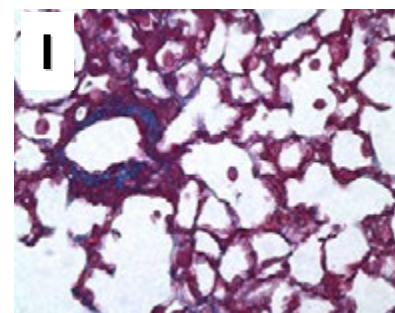

Supplement: 12885_2012_3812_MOESM8_ESM.pdf [file 12885_2012_3812_MOESM8_ESM.pdf]

**A**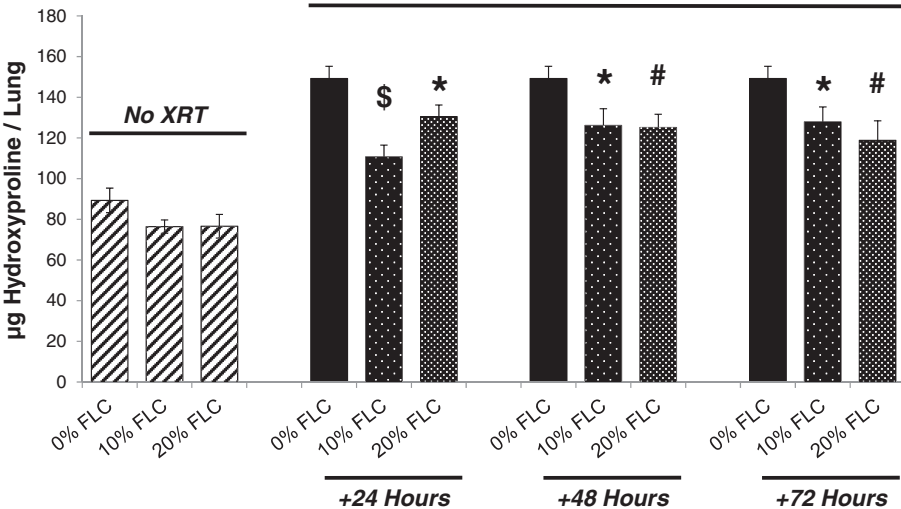**B**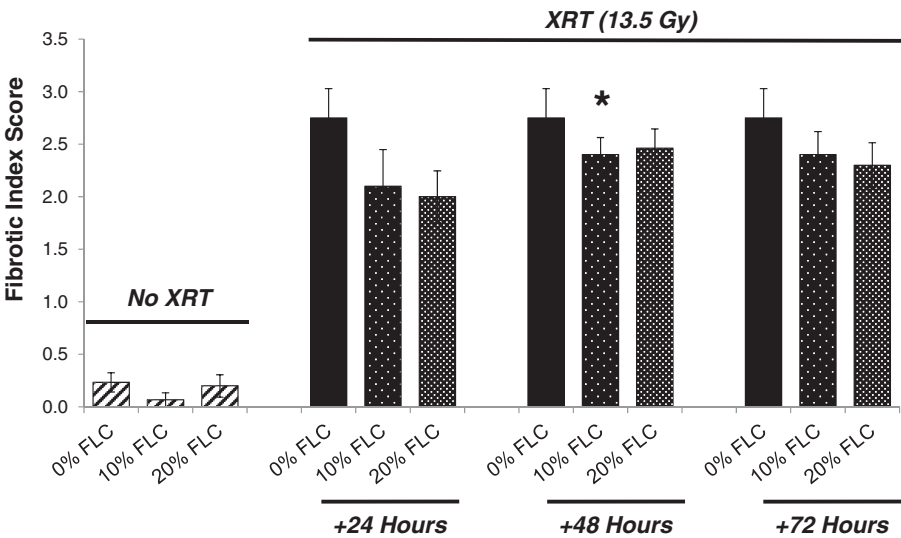

Supplement: 12885_2012_3812_MOESM9_ESM.pdf [file 12885_2012_3812_MOESM9_ESM.pdf]
